# Supplementary material for: Carotenoids improve bacterial tolerance towards biobutanol through membrane stabilization
Source: Royal Society of Chemistry journal article supplement (doi:10.1039/d0en00983k), 2021-01-01
Supplement: d0en00983k1.pdf [file d0en00983k1.pdf]

### Supplementary Information for

#### Carotenoids Improve Bacterial Tolerance Towards Biobutanol Through Membrane Stabilization

Geraldine W.N. Chia<sup>a,b</sup>, Thomas Seviour<sup>b,c</sup>, Staffan Kjelleberg<sup>b,d</sup>, Jamie Hinks<sup>b,§</sup>

<sup>a</sup> Interdisciplinary Graduate School (IGS), Nanyang Technological University, Singapore

<sup>b</sup> Singapore Centre for Environmental Sciences Engineering (SCELSE),  
Nanyang Technological University, Singapore

<sup>c</sup> Centre for Water Technology (WATEC), Department of Engineering, Aarhus University, Nørrebrogade  
44, DK-8000, Aarhus C, Denmark

<sup>d</sup> School of Biological, Earth and Environmental Sciences, University of New South Wales, Australia

§ Corresponding authors: [jhinks@ntu.edu.sg](mailto:jhinks@ntu.edu.sg)

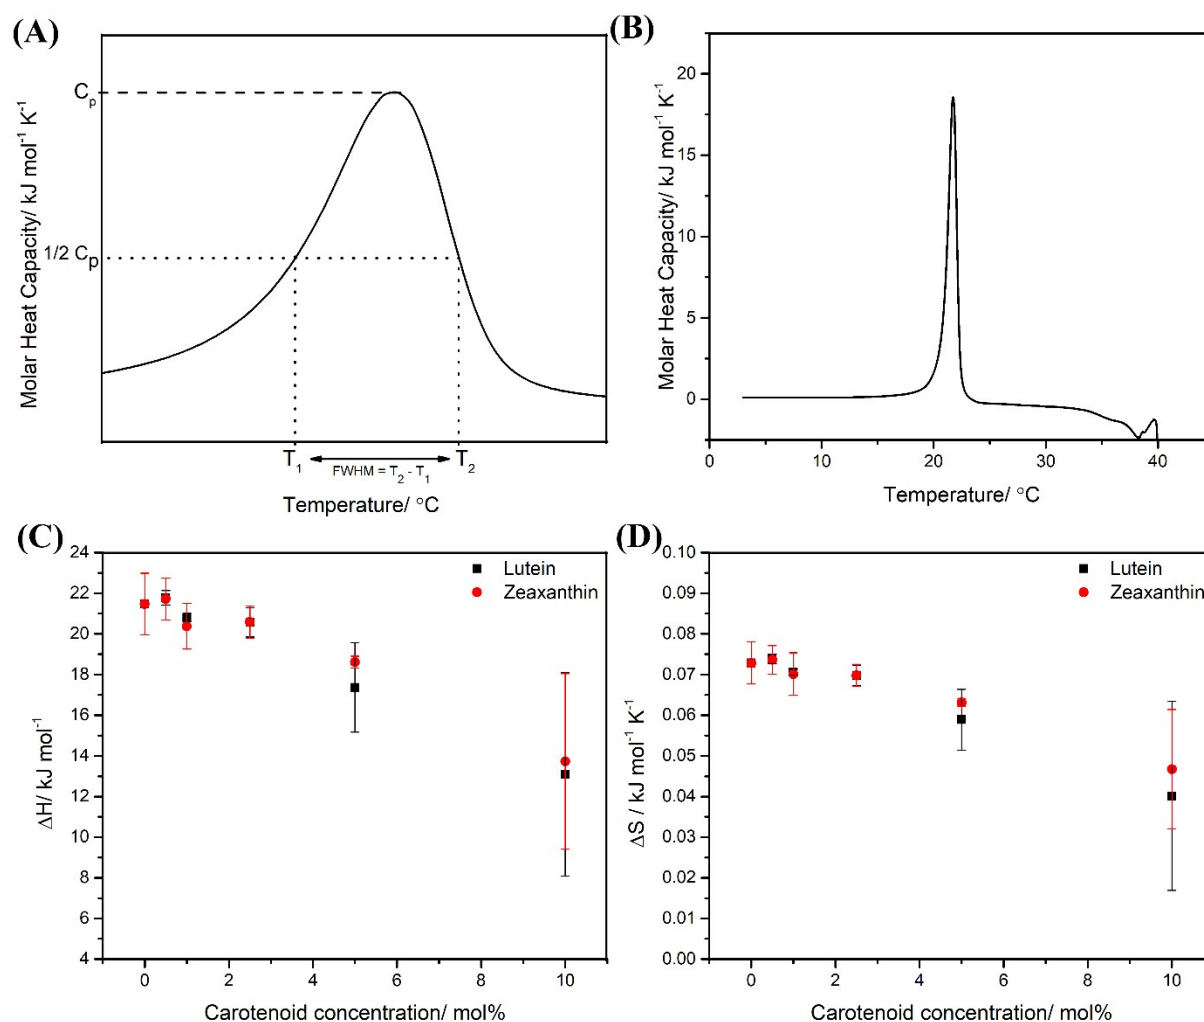

**Figure S1.** (A) Molar heat capacity ( $C_p$ ,  $\text{kJ mol}^{-1} \text{K}^{-1}$ ) and full width at half maximum (FWHM,  $^\circ\text{C}$ ) determination. (B) DSC cooling thermogram of control PEPG MLV (C) Change in enthalpy,  $\Delta H$  ( $\text{kJ mol}^{-1}$ ) and (D) change in entropy,  $\Delta S$  ( $\text{kJ mol}^{-1} \text{K}^{-1}$ ) as a function of carotenoid concentration.

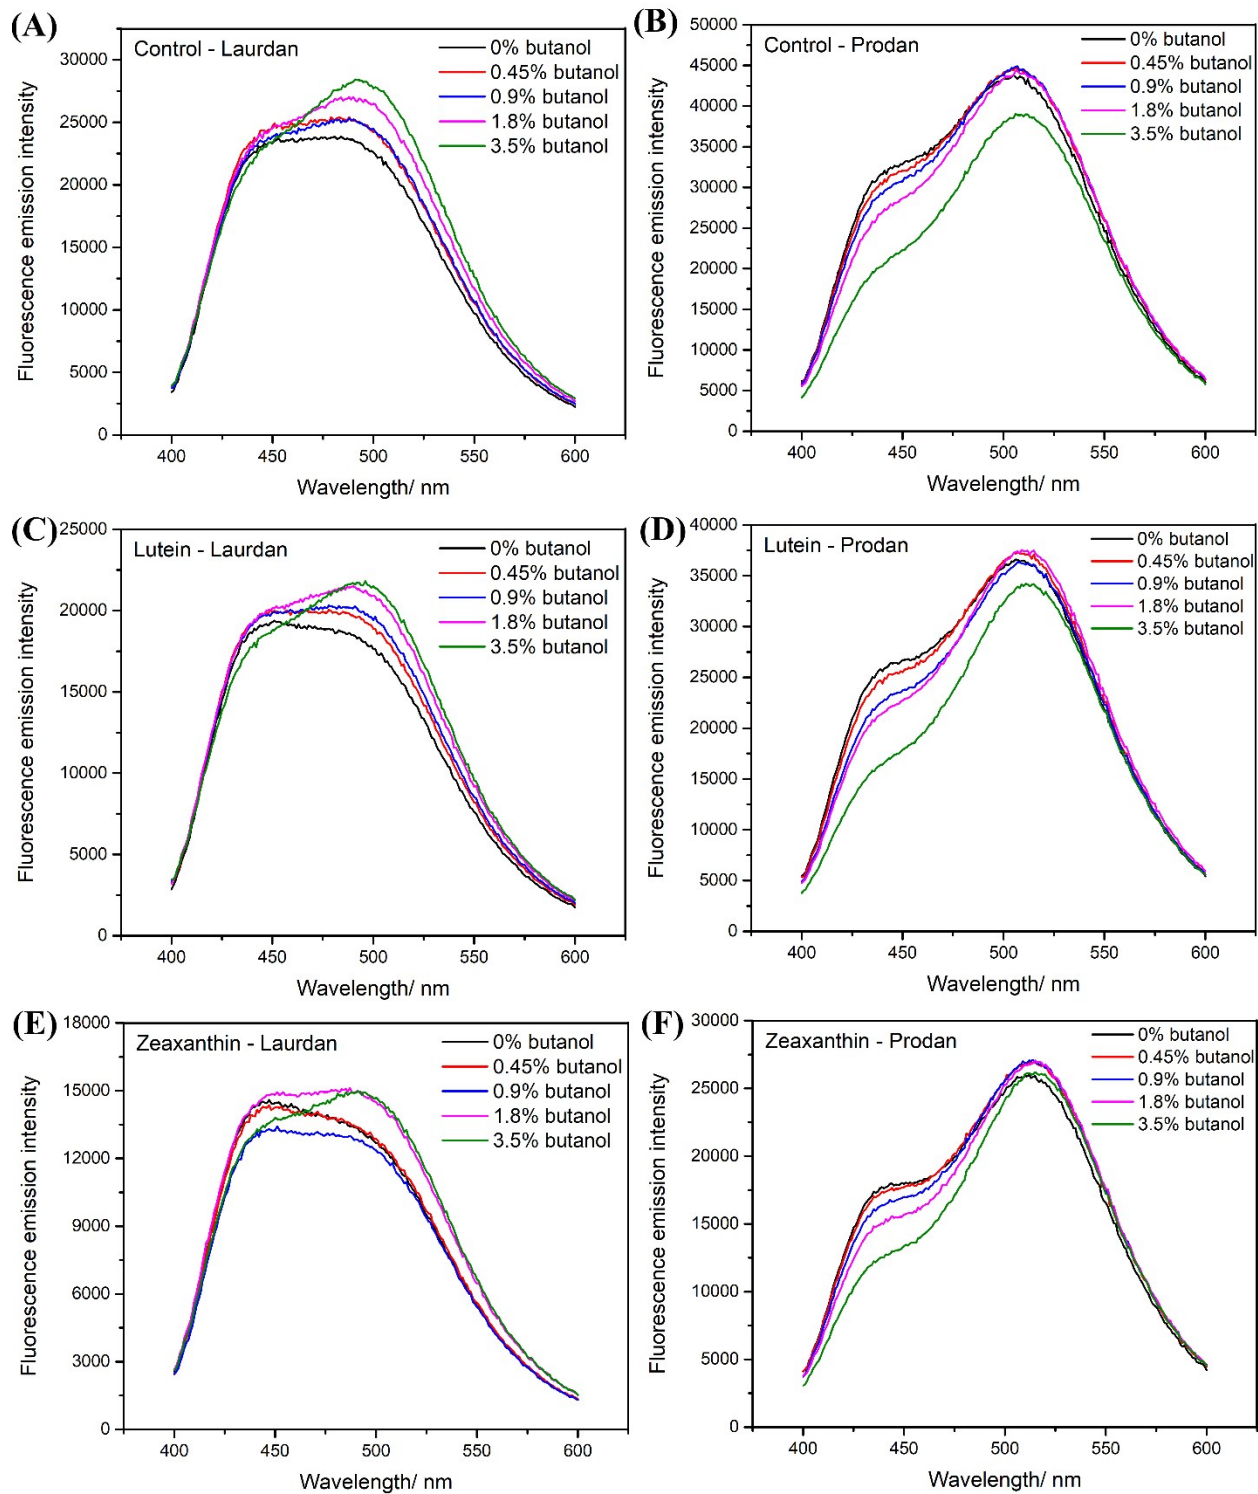

**Figure S2.** Representative fluorescence emission spectrum from Laurdan (A, C, E) and Prodan (B, D, F) in control MLVs (A, B), 0.5 mol% LUT-MLVs (C, D) and 0.5 mol% ZEA-MLVs (E, F).

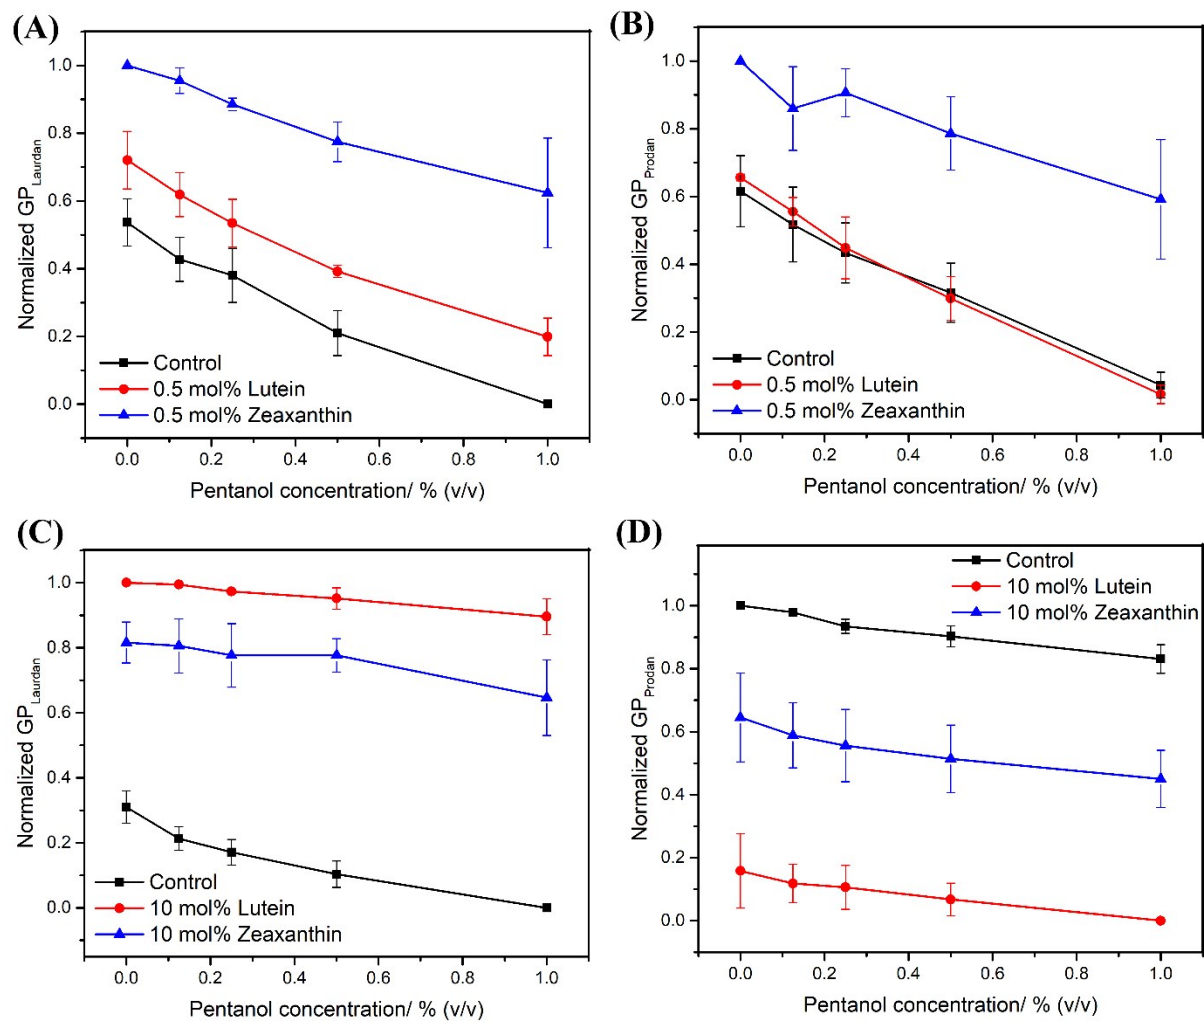

**Figure S3.** Generalized polarization (GP) measured using Laurdan (A, C) and Prodan (B, D) in control MLVs and MLVs with 0.5 mol% (A, B) or 10 mol% (C, D) carotenoids that were challenged with pentanol up to 1% (v/v).

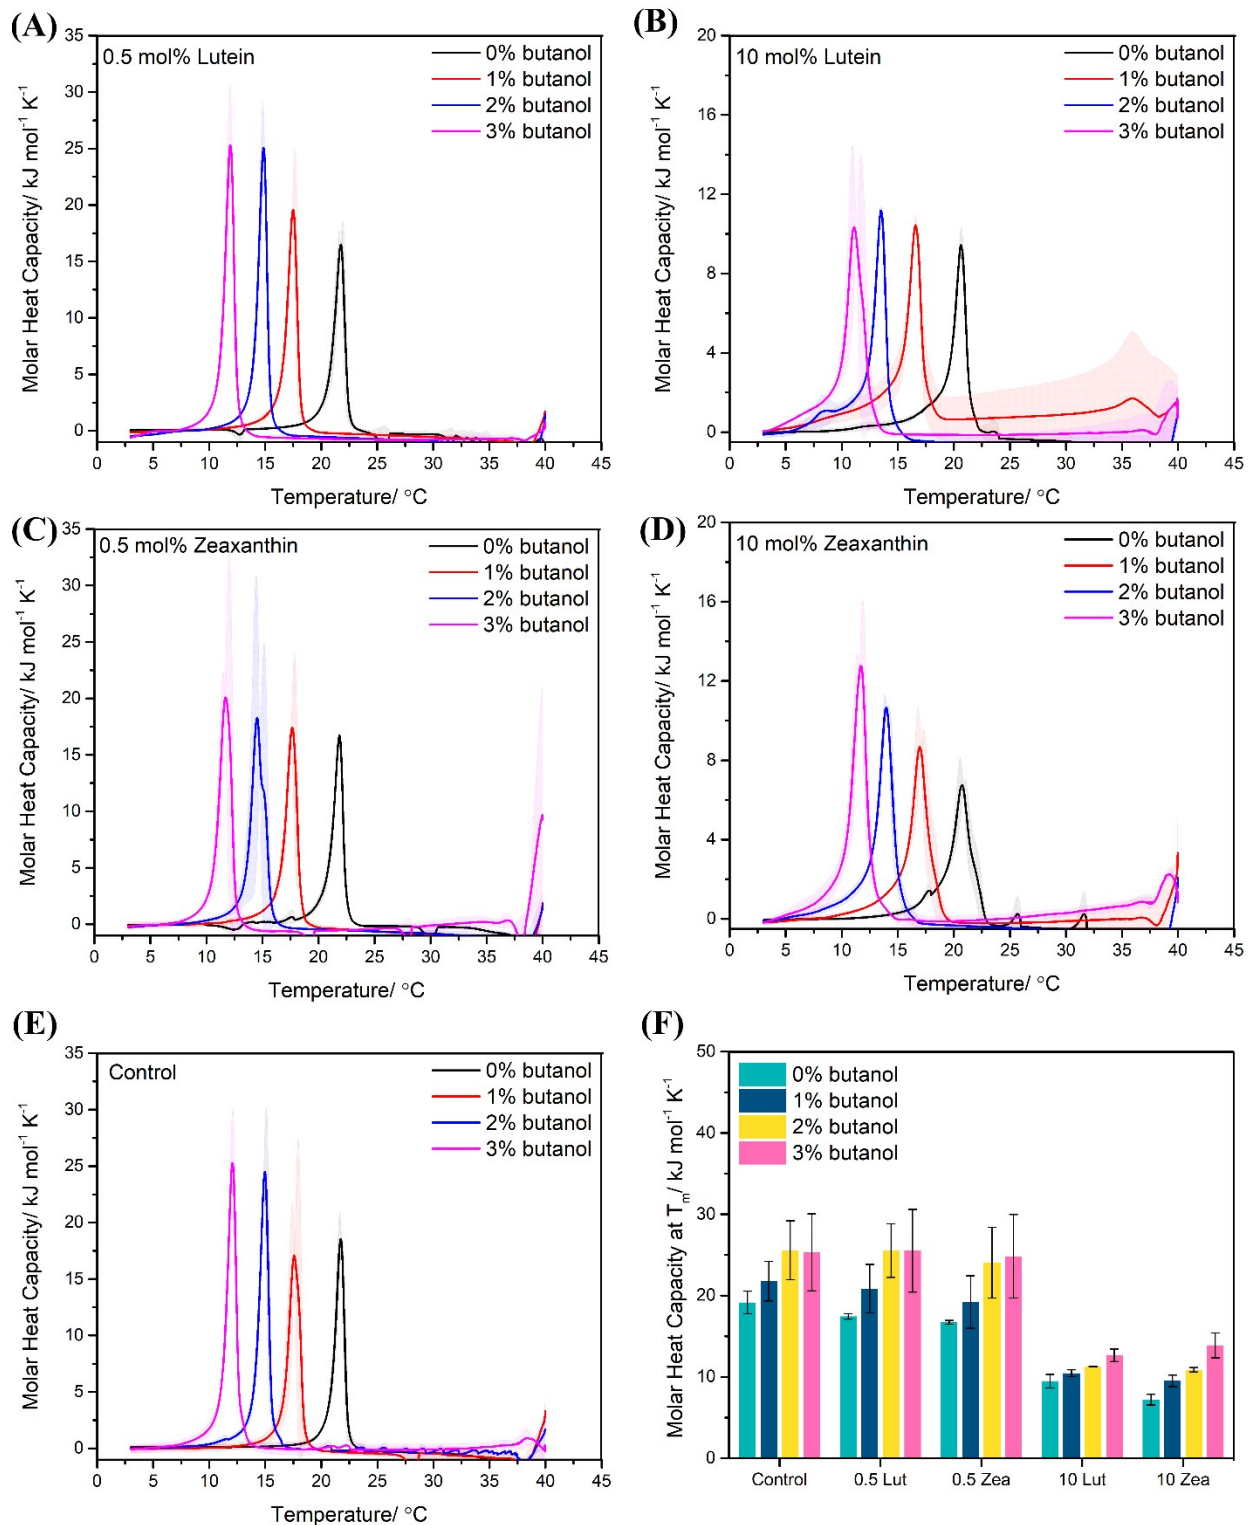

**Figure S4.** Butanol disorders acyl tails in MLVs and high carotenoid concentrations mitigate the disordering effects. (A) DSC cooling thermograms of 0.5 mol% LUT-MLVs, (B) 10 mol% LUT-MLVs (C), 0.5 mol% ZEA-MLVs, (D) 10 mol% ZEA-MLVs and (E) control MLVs that were challenged with butanol from 0-3% (v/v).

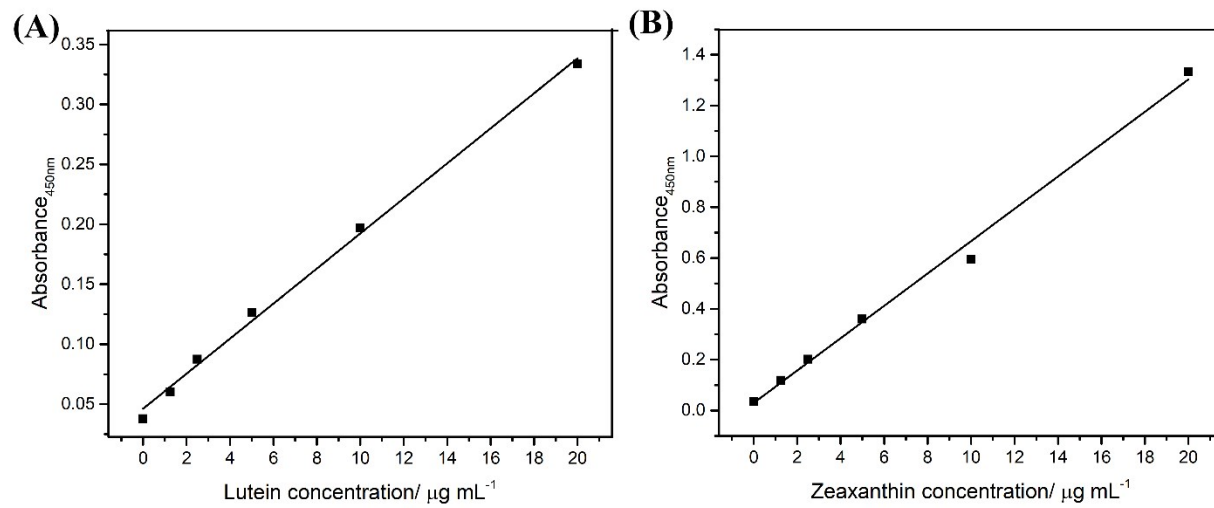

**Figure S5.** Calibration curves of lutein and zeaxanthin in methanol.

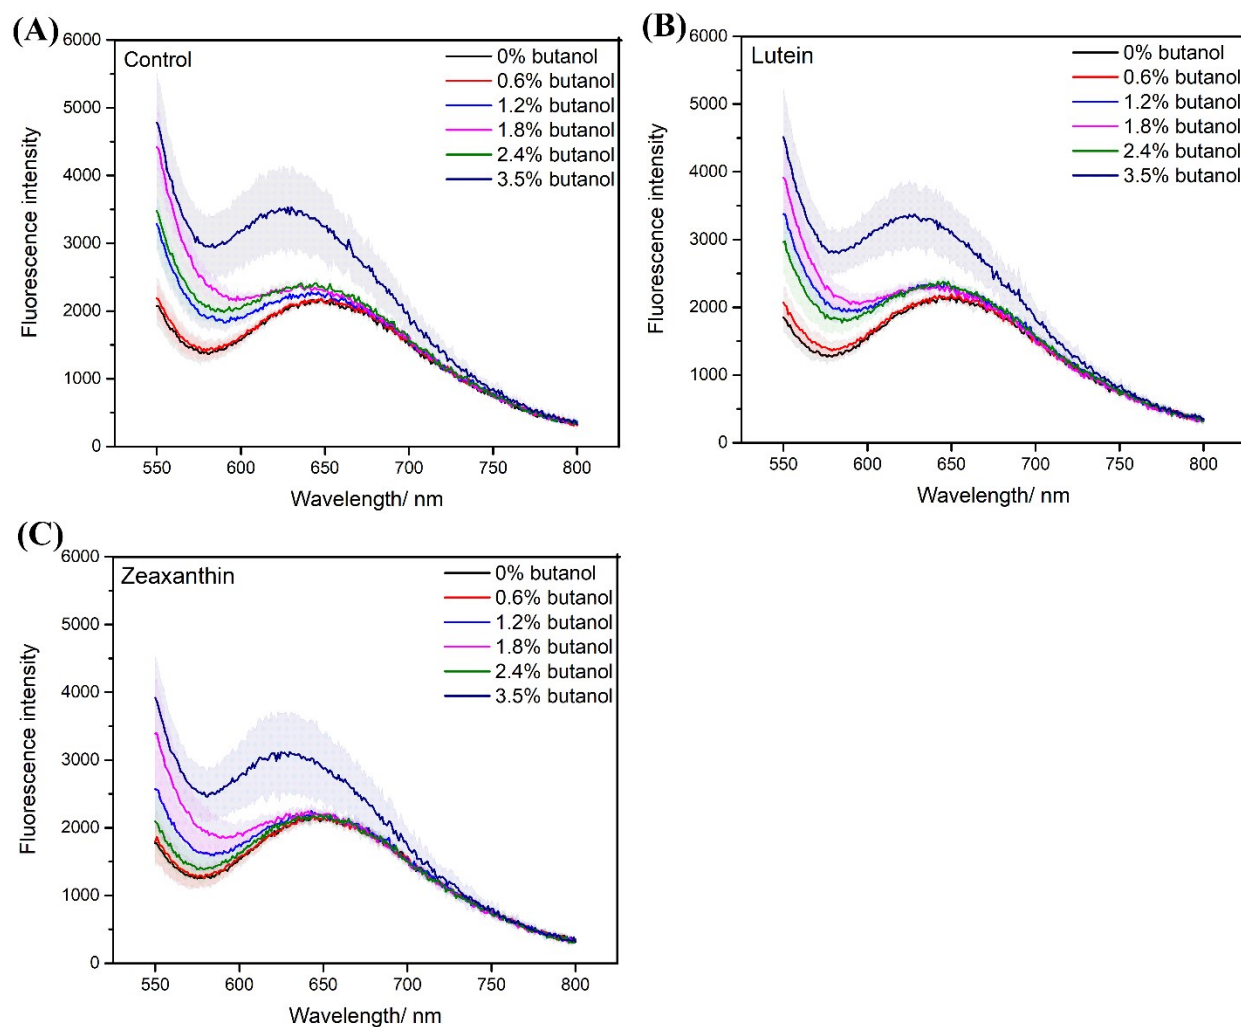

**Figure S6.** Fluorescence spectrum of propidium iodide (PI) signal at 630 nm ( $\lambda_{\text{ex}} = 465$  nm) as a function of increasing butanol concentrations used to treat control cells (A), cells treated with 10  $\mu\text{g/mL}$  lutein (B) and zeaxanthin (C).

**Table S1.** Average molecular weight of MLVs used in this study. <sup>a</sup>Full width at half maximum (FWHM) values of the main phase transition peaks in the cooling DSC thermograms in Figure 2A and 2B. <sup>b</sup>Lutein and zeaxanthin are positional isomers and have the same molecular weight (569), thus the average molecular weights of the MLVs are the same.

| Carotenoid concentration/ mol% | Lutein <sup>a</sup> / °C | Zeaxanthin <sup>a</sup> /°C | Molecular weight <sup>b</sup> |
|--------------------------------|--------------------------|-----------------------------|-------------------------------|
| 0                              | 0.89 ±0.05               | 0.89 ±0.05                  | 726                           |
| 0.5                            | 0.99 ±0.08               | 0.98 ±0.09                  | 725                           |
| 1                              | 1.01 ±0.01               | 1.07 ±0.09                  | 724                           |
| 2.5                            | 1.05 ±0.12               | 1.10 ±0.10                  | 722                           |
| 5                              | 2.22 ±1.25               | 1.30 ±0.38                  | 718                           |
| 10                             | 1.2 ±0.06                | 1.67 ±0.46                  | 707                           |

**Table S2.**  $\Delta T_m$  calculated from cooling DSC thermograms of control MLVs and MLVS with carotenoids.

| Butanol/<br>% (v/v) | $\Delta T_m/^\circ\text{C}$ |                     |                        |                     |                       |
|---------------------|-----------------------------|---------------------|------------------------|---------------------|-----------------------|
|                     | Control                     | 0.5 mol%<br>Lutein  | 0.5 mol%<br>Zeaxanthin | 10 mol%<br>Lutein   | 10 mol%<br>Zeaxanthin |
| 1                   | 4.30 ( $\pm 0.13$ )         | 4.25 ( $\pm 0.35$ ) | 4.21 ( $\pm 0.20$ )    | 4.02 ( $\pm 0.05$ ) | 3.75 ( $\pm 0.0$ )    |
| 2                   | 7.22 ( $\pm 0.35$ )         | 6.89 ( $\pm 0.09$ ) | 7.09 ( $\pm 0.52$ )    | 7.11 ( $\pm 0.04$ ) | 6.80 ( $\pm 0.13$ )   |
| 3                   | 9.48 ( $\pm 0.40$ )         | 9.85 ( $\pm 0.11$ ) | 10.07 ( $\pm 0.28$ )   | 9.31 ( $\pm 0.56$ ) | 9.14 ( $\pm 0.57$ )   |

**Table S3.** Parameters to derive  $K_p$  from the gradient ( $m$ ) of the linear fit,  $\Delta H_{m,0}$ ,  $T_{m,0}$  for control MLVs and MLVs with carotenoids.

| MLV        | [Carotenoid]/% mol | Gradient, $m$       | $\Delta H_{m,0}/\text{kJ mol}^{-1}$ | $T_{m,0}/^\circ\text{C}$ |
|------------|--------------------|---------------------|-------------------------------------|--------------------------|
| Control    | -                  | 30.8 ( $\pm 0.4$ )  | 21.5 ( $\pm 1.5$ )                  | 21.7 ( $\pm 0.1$ )       |
| Lutein     | 0.5                | 31.1 ( $\pm 0.6$ )  | 21.8 ( $\pm 0.35$ )                 | 21.8 ( $\pm 0.2$ )       |
| Lutein     | 10                 | 30.2 ( $\pm 1.2$ )  | 13.1 ( $\pm 5.0$ )                  | 20.6 ( $\pm 0.1$ )       |
| Zeaxanthin | 0.5                | 31.8 ( $\pm 0.01$ ) | 21.7 ( $\pm 1.0$ )                  | 21.8 ( $\pm 0.1$ )       |
| Zeaxanthin | 10                 | 29.3 ( $\pm 1.3$ )  | 13.7 ( $\pm 4.3$ )                  | 20.8 ( $\pm 0.3$ )       |
